# Supplementary material
Source: publisher figshare collection journal article supplement (https://sage.figshare.com/ndownloader/files/17682494)
Supplement: Supplementary file [file 17682494]

**Appendix Table A1 Beliefs about Medicine Questionnaire**

|                                                                                                                                                                                                                               |
|-------------------------------------------------------------------------------------------------------------------------------------------------------------------------------------------------------------------------------|
| <b><i>Overuse</i></b>                                                                                                                                                                                                         |
| If doctors had more time with patients they would prescribe fewer medicines<br>Doctors use too many medicines<br>Doctors place too much trust on medicines<br>Natural remedies are safer than medicines                       |
| <b><i>Harm</i></b>                                                                                                                                                                                                            |
| Most medicines are addictive<br>Medicines do more harm than good<br>People who take medicines should stop their treatment for a while every now and again<br>Most medicines are poisons                                       |
| <b><i>Benefit</i></b>                                                                                                                                                                                                         |
| Medicines help many people to live better lives<br>In most cases the benefits of medicines outweigh the risks<br>In the future medicines will be developed to cure most diseases<br>Medicines help many people to live longer |

The Beliefs about Medicine Questionnaire (BMQ-General) uses a 5-point Likert scale ranging from “strongly agree” to “strongly disagree” with a midpoint “unsure.” Permission to use the BMQ-General was sought from its originator, Professor Rob Horne.

**Appendix Table A2 Comparison of Age  
across Survey Mode-Frame Pairs and Census, 2011**

|         | <b>Census, %</b> | <b>CAPI, %</b> | <b>Mail, %</b> | <b>IP-IM, %</b> | <b>IP-RN, %</b> |
|---------|------------------|----------------|----------------|-----------------|-----------------|
| 18 – 19 | 3.22             | 2.40           | 0.29           | 2.60            | 1.30            |
| 20 – 24 | 8.65             | 8.55           | 1.24           | 5.90            | 6.00            |
| 25 – 29 | 8.67             | 7.78           | 4.01           | 5.40            | 7.30            |
| 30 – 34 | 8.30             | 8.36           | 4.01           | 11.30           | 11.20           |
| 35 – 39 | 8.44             | 8.26           | 4.77           | 8.90            | 8.10            |
| 40 – 44 | 9.31             | 8.93           | 6.97           | 8.90            | 9.60            |
| 45 – 49 | 9.35             | 8.65           | 8.68           | 5.80            | 9.20            |
| 50 – 54 | 8.24             | 8.26           | 9.26           | 11.70           | 9.60            |
| 55 – 59 | 7.27             | 6.34           | 10.97          | 10.20           | 9.40            |
| 60 – 64 | 7.66             | 6.72           | 11.74          | 7.00            | 7.80            |
| 65 – 69 | 6.07             | 9.51           | 13.74          | 10.20           | 11.40           |
| 70 – 74 | 4.96             | 5.76           | 10.11          | 7.90            | 5.70            |
| 75 – 79 | 4.04             | 5.00           | 6.49           | 3.00            | 1.90            |
| 80 – 84 | 3.01             | 3.46           | 4.77           | 1.00            | 1.20            |
| 85 +    | 2.81             | 2.02           | 2.96           | 0.20            | 0.30            |

*The 5-year interval bins are selected to match the data reported by the ONS for the 2011 UK Census. CAPI, computer-assisted personal interviews; IP-IM, internet panel Ipsos-MORI; IP-RN, internet panel ResearchNow; mail, postal.*

**Appendix Table A3 Comparison of Gender, Education, Self-Assessed Health, Activities of Daily Living, Income, and Internet Access across Survey Mode-Frame Pairs and UK Population**

|                                                      | UK<br>Population, |         |         |          |          |
|------------------------------------------------------|-------------------|---------|---------|----------|----------|
|                                                      | %                 | CAPI, % | Mail, % | IP-IM, % | IP-RN, % |
| Gender <sup>1c</sup>                                 | 49.1              | 49.1    | 40.8    | 49.2     | 49.8     |
| Education <sup>2c</sup>                              | 27.2              | 29.5    | 45.7    | 42.2     | 43.4     |
| Employment <sup>c</sup>                              |                   |         |         |          |          |
| <i>employee</i>                                      | 52.15             | 47.21   | 51.52   | 52.09    | 50.21    |
| <i>self-employed</i>                                 | 9.48              | 8.58    | 8.75    | 7.62     | 8.59     |
| <i>unemployed</i>                                    | 4.43              | 6.01    | 1.8     | 5.85     | 5.38     |
| <i>student</i>                                       | 9.26              | 6.55    | 0.9     | 5.11     | 4.97     |
| <i>retired</i>                                       | 13.88             | 19.1    | 28.51   | 17.22    | 18.32    |
| <i>looking after home or family</i>                  | 4.27              | 8.26    | 4.6     | 5.53     | 4.97     |
| <i>long-term sick or disabled</i>                    | 4.34              | 3.76    | 3.59    | 5.11     | 6.73     |
| <i>other</i>                                         | 2.18              | 0.54    | 0.34    | 1.46     | 0.83     |
| Self-assessed health <sup>c</sup>                    |                   |         |         |          |          |
| <i>Very Good/ Good</i>                               | 76.92             | 71.88   | 67.78   | 68.20    | 69.90    |
| <i>Fair</i>                                          | 16.13             | 20.97   | 25.51   | 24.50    | 21.50    |
| <i>Bad/ Very Bad</i>                                 | 6.95              | 7.15    | 6.70    | 7.30     | 8.60     |
| Activities of daily living <sup>c</sup>              |                   |         |         |          |          |
| <i>Yes, limited a lot</i>                            | 10.41             | 10.30   | 10.49   | 8.90     | 11.10    |
| <i>Yes, limited a little</i>                         | 11.42             | 14.30   | 24.84   | 25.80    | 23.60    |
| <i>No</i>                                            | 78.16             | 75.41   | 64.58   | 65.30    | 65.30    |
| Income <sup>f</sup>                                  |                   |         |         |          |          |
| <i>Up to £5,199 per year</i>                         | 2.0               | 7.07    | 3.11    | 5.21     | 5.29     |
| <i>£5,200 to £10,399 per year</i>                    | 6.9               | 15.10   | 12.19   | 8.69     | 10.92    |
| <i>£10,400 to £15,599 per year</i>                   | 12.9              | 14.69   | 13.38   | 13.33    | 12.87    |
| <i>£15,600 to £20,799 per year</i>                   | 12.9              | 11.16   | 12.90   | 11.47    | 12.07    |
| <i>£20,800 to £25,999 per year</i>                   | 10.9              | 14.01   | 10.04   | 12.86    | 10.57    |
| <i>£26,000 to £31,199 per year</i>                   | 8.9               | 7.35    | 8.24    | 11.59    | 13.10    |
| <i>£31,200 to £36,399 per year</i>                   | 7.9               | 7.35    | 7.17    | 9.15     | 7.36     |
| <i>£36,400 to £51,999 per year</i>                   | 15.8              | 9.66    | 13.86   | 13.90    | 17.13    |
| <i>£52,000 and above per year</i>                    | 21.8              | 13.61   | 19.12   | 13.79    | 10.69    |
| Internet access <sup>e</sup> (yes)                   | 86.8              | 85.6    | 83.2    | 100.0    | 100.0    |
| Attitude to voting <sup>g</sup>                      |                   |         |         |          |          |
| <i>It's not really worth voting</i>                  | 16.3              | 19.64   | 12.42   | 12.70    | 14.10    |
| <i>People should vote only if they care who wins</i> | 20.7              | 19.26   | 19.32   | 21.80    | 22.90    |
| <i>It's everyone's duty to vote</i>                  | 62.0              | 61.11   | 68.26   | 65.50    | 63.00    |

*Characteristics are reported and compared for respondents who completed the questions and excluding item nonresponse. CAPI, computer-assisted personal interviews; IP-IM, internet panel Ipsos-MORI; IP-RN, internet panel ResearchNow; mail, postal.*

*<sup>1</sup>Gender is measured as proportion of the UK population/sample who are male. <sup>2</sup>Education is measured as the proportion of the UK population/sample who have at least a higher education qualification. <sup>c</sup>UK population data source is UK census 2011, <sup>f</sup>UK population data source is Family Resources Survey, <sup>e</sup>UK population data source is OECD statistics (<https://data.oecd.org/ict/internet-access.htm>) based on Eurostat Community survey on ICT usage in households and by individuals on Eurostat Community survey on ICT usage in households and by individuals. <sup>g</sup>UK population data source is UK Social Attitudes Survey.*

**Appendix Table A4 Comparison of Chronic Illness, Membership of Minor Ailments Scheme, and Beliefs about Medicine Questionnaire across Survey Mode-Frame Pairs**

|                                                   | CAPI, % | Mail, % | IP-IM, % | IP-RN, % |
|---------------------------------------------------|---------|---------|----------|----------|
| Chronic illness/<br><i>self-reported “Yes”</i>    | 29.74   | 47.46   | 0        | 0        |
| Minor ailments scheme                             |         |         |          |          |
| <i>Yes</i>                                        | 4.00    | 2.00    | 1.71     | 2.02     |
| <i>No</i>                                         | 91.33   | 90.59   | 91.16    | 92.22    |
| <i>Not Sure</i>                                   | 4.67    | 7.41    | 7.14     | 5.67     |
| Beliefs about Medicine Questionnaire <sup>a</sup> |         |         |          |          |
| <i>Overuse</i>                                    | 46.90   | 40.55   | 42.10    | 38.10    |
| <i>Harm</i>                                       | 18.78   | 12.12   | 16.90    | 11.70    |
| <i>Benefit</i>                                    | 91.13   | 93.49   | 90.90    | 91.50    |

Characteristics are reported and compared for respondents who completed the questions and excluding item nonresponse. CAPI, computer-assisted personal interviews; IP-IM, internet panel Ipsos-MORI; IP-RN, internet panel ResearchNow; mail, postal.

<sup>a</sup>*The table presents results for the three scales included within the Beliefs about Medicine Questionnaire. The percentage of each sample with an average score of 3 or above (out of 5) for that scale is reported.*
